# Supplementary material for: The human foot functions like a spring of adjustable stiffness during running
Source: Oxford University Press journal article supplement (doi:10.1242/jeb.219667), 2020-01-01
Supplement: jeb219667supp.pdf [file jeb219667supp.pdf]

**Table S1. Results of statistical tests.**

| Response                 | ANOVA  |         | Preferred v. Low |         | Preferred v. High |         | Low v. High |         |
|--------------------------|--------|---------|------------------|---------|-------------------|---------|-------------|---------|
|                          | Chi-Sq | P       | t-ratio          | P       | t-ratio           | P       | t-ratio     | P       |
| $\Delta z_{arch}$        | 258    | <0.0001 | 5.8              | <0.0001 | -10.1             | <0.0001 | -15.9       | <0.0001 |
| peak $F_{beam1}$         | 144    | <0.0001 | 3.6              | 0.0006  | -8.1              | <0.0001 | -11.7       | <0.0001 |
| peak $F_{beam2}$         | 50     | <0.0001 | 0.7              | 0.49    | -5.7              | <0.0001 | -6.5        | <0.0001 |
| $\Delta \theta_{mid}$    | 228    | <0.0001 | 5.4              | <0.0001 | -9.6              | <0.0001 | -14.9       | <0.0001 |
| peak $M_{mid}^a$         | 43     | <0.0001 | 2.2              | 0.04    | -4.3              | 0.0002  | -6.4        | <0.0001 |
| FSA <sup>b</sup>         | 8.3    | 0.016   | 244              | 0.19    | 325               | 0.001   | 221         | 0.46    |
| $k_{beam1,load}^{a,c}$   | 9.7    | 0.008   | -1.1             | 0.26    | 1.9               | 0.12    | 3.1         | 0.010   |
| $k_{beam1,unload}^a$     | 68.6   | <0.0001 | -2.3             | 0.028   | 5.7               | <0.0001 | 8.1         | <0.0001 |
| $k_{beam2,load}^{a,e}$   | 11.8   | 0.003   | -2.4             | 0.038   | 0.9               | 0.37    | 3.3         | 0.006   |
| $k_{beam2,unload}^a$     | 86.7   | <0.0001 | -3.3             | 0.002   | 5.8               | <0.0001 | 9.2         | <0.0001 |
| $k_{mid,load}^{a,c}$     | 12.7   | 0.002   | -0.54            | 0.59    | 2.8               | 0.016   | 3.4         | 0.004   |
| $k_{mid,unload}^a$       | 101    | <0.0001 | -2.3             | 0.028   | 5.7               | <0.0001 | 8.1         | <0.0001 |
| $k_{leg,load}^a$         | 101.0  | <0.0001 | -7.2             | <0.0001 | 2.4               | 0.021   | 9.6         | <0.0001 |
| $k_{leg,unload}^{a,d}$   | 68.6   | <0.0001 | -2.3             | 0.028   | 5.7               | <0.0001 | 8.1         | <0.0001 |
| $k_{ankle,load}^{a,c}$   | 81.6   | <0.0001 | -4.9             | <0.0001 | 4.0               | 0.0002  | 9.0         | <0.0001 |
| $k_{ankle,unload}^{a,d}$ | 582.6  | <0.0001 | -7.7             | <0.0001 | 15.7              | <0.0001 | 23.8        | <0.0001 |
| $k_{knee,load}^{a,d}$    | 40.7   | <0.0001 | -3.3             | 0.003   | 3.0               | 0.004   | 6.4         | <0.0001 |
| $k_{knee,unload}^{a,f}$  | 30.2   | <0.0001 | -3.4             | 0.003   | 2.0               | 0.052   | 5.7         | <0.0001 |

Except where noted otherwise, omnibus tests were Type 3 ANOVAs conducted on model variance from linear mixed models where participant identity was set as a random variable.

Except where noted otherwise, post-hoc tests were pairwise comparisons, with the P-value

corrected using a Holm-Bonferroni correction. The sample size for all tests is N=27 participants, except where noted otherwise. FSA was included as a covariate in all tests of quasi-stiffness ( $k$ ) variables.

<sup>a</sup> Variable log-transformed to achieve normality for parametric statistical tests.

<sup>b</sup> Variable could not be made normal by transformation, so non-parametric tests used. Friedman's test used as omnibus test, and Wilcoxon signed-rank tests used as post-hoc paired tests (statistic for these tests is  $W$  rather than  $t$ -ratio).

<sup>c</sup> FSA had a significant, positive association with the variable.

<sup>d</sup> FSA had a significant, negative association with the variable.

<sup>e</sup> Had to remove three subjects (S04, S13, S31), each of whom exhibited outlier values.

<sup>f</sup> Had to remove three subjects (S02, S06, S10, S15), each of whom exhibited outlier values.

## Table S2

[Click here to Download Table S2](#)

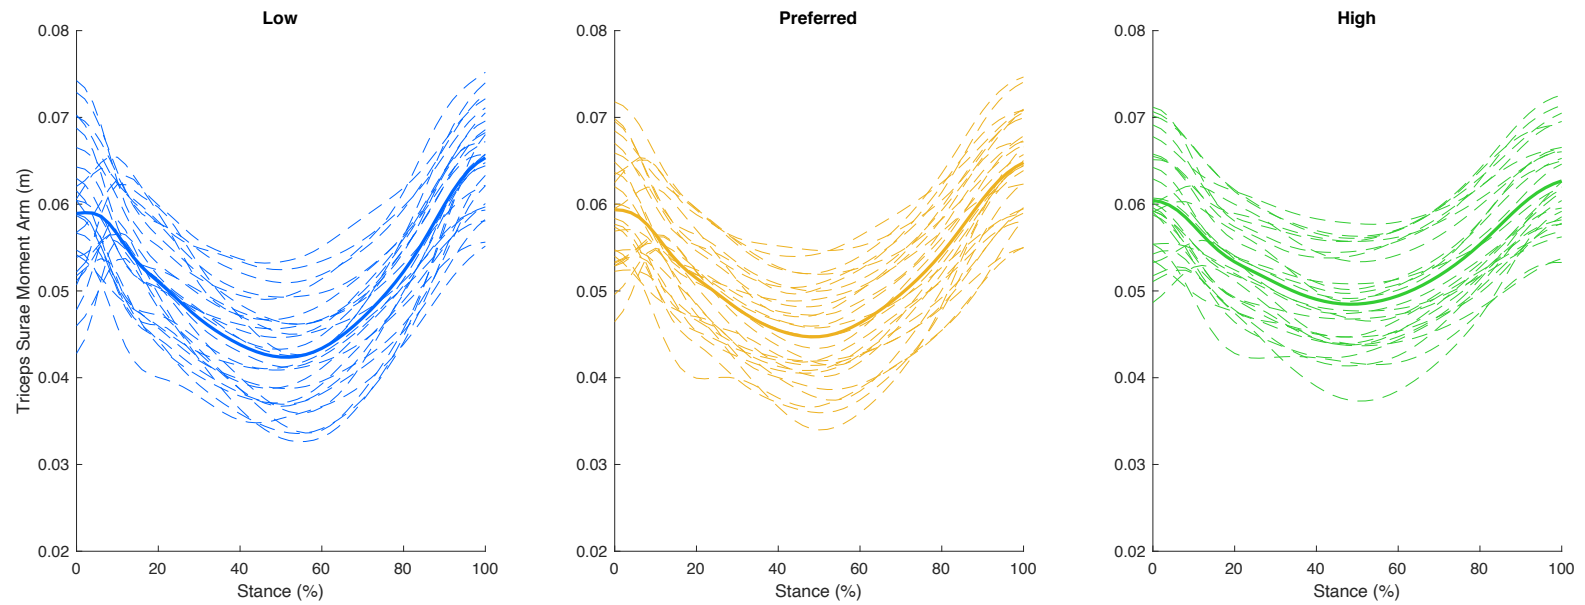

**Fig. S1. Average triceps surae moment arm values across stance phase among different running frequency conditions.** Dashed lines represent averages from all steps for individual participants, and solid lines indicate average of all participants.

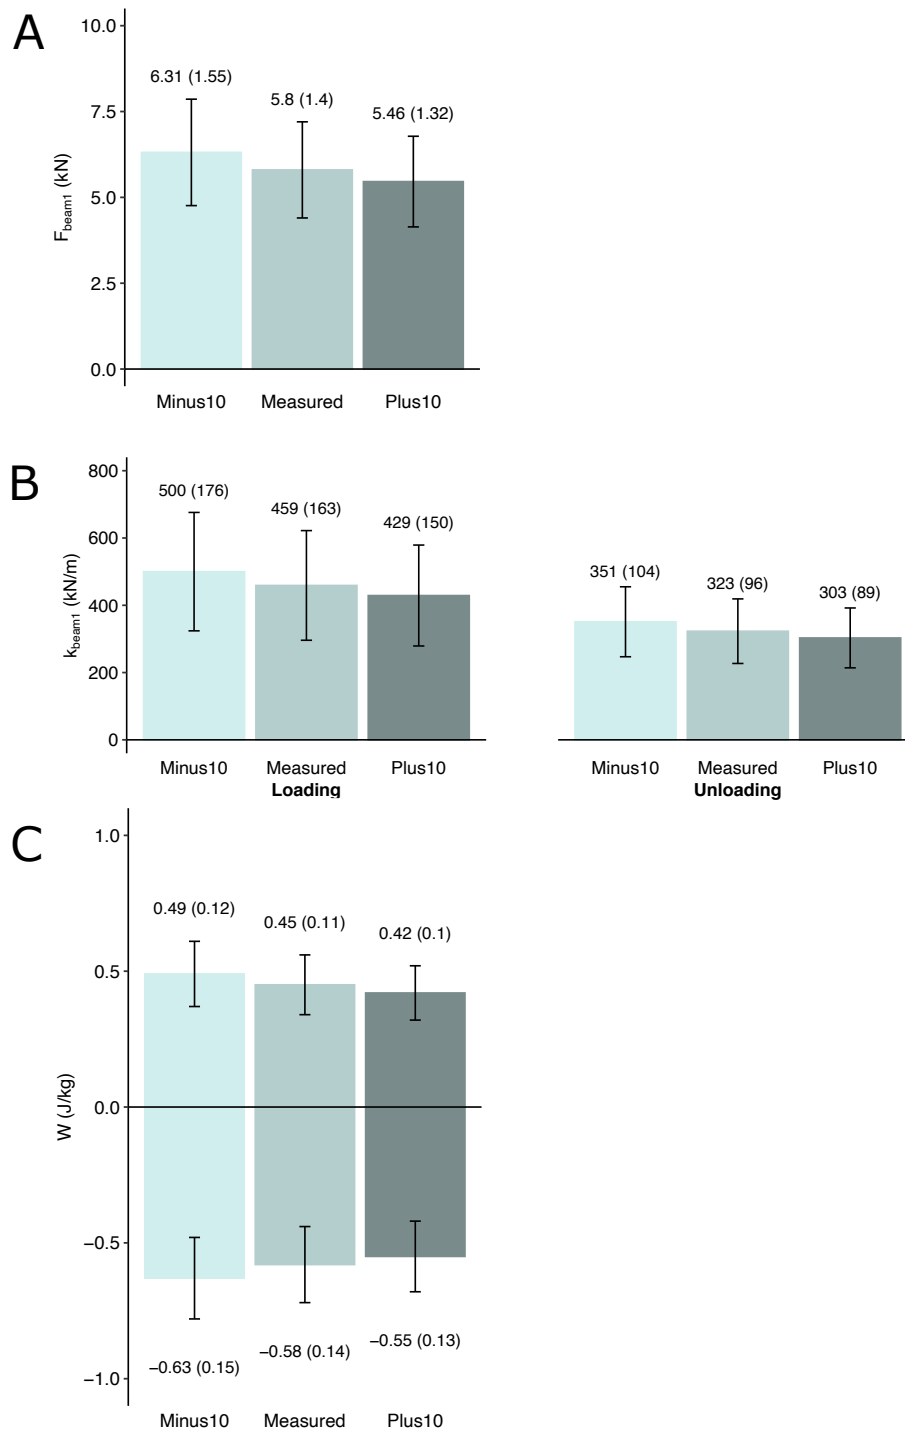

**Fig. S2. Effects of adjusting triceps surae moment arm length by -10% ('Minus10') and +10% ('Plus10'), relative to the actual distance measured ('Measured').** Bars represent average values calculated from all participants (N=27) during preferred frequency runs, and error

bars represent  $\pm$  one standard deviation. Numbers above/below bars indicate *mean (s.d.)*. (A) Beam1 bending force ( $F_{beam1}$ ) differs by 16% on average between  $\pm 10\%$  moment arm length values. (B) Beam1 stiffness ( $k_{beam1}$ ) differs by 17% and 16% during the ‘loading’ and ‘unloading’ periods of stance, respectively, between  $\pm 10\%$  moment arm length values. (C) Beam1 positive and negative work ( $W_{beam1}$ ) values differ by 15% and 14%, respectively, between  $\pm 10\%$  moment arm length values.

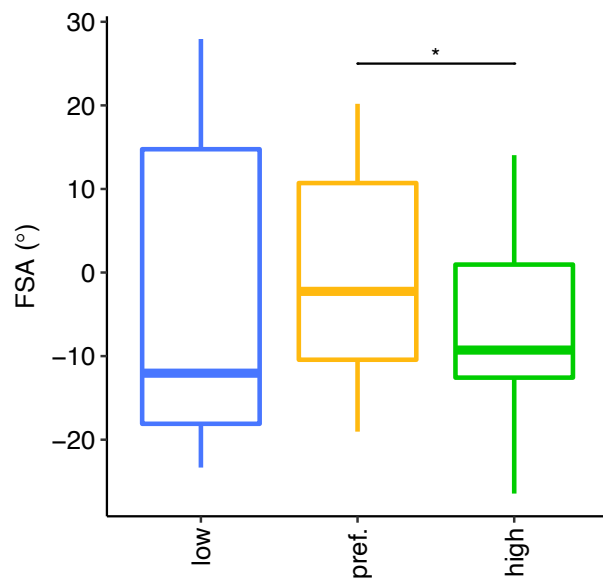

**Figure S3. Average foot strike angle (FSA) among frequency conditions (N=27).** Values above 0 represent rearfoot strikes, and values below 0 represent forefoot strikes. Asterisk denotes significant difference among running conditions.
